# Supplementary material
Source: Springer Nature journal article supplement (https://www.springermedizin.de/resource/supplementary/13256_2014_2934_MOESM2_ESM.pdf/9650848)
Supplement: MOESM2 [file 9650848]

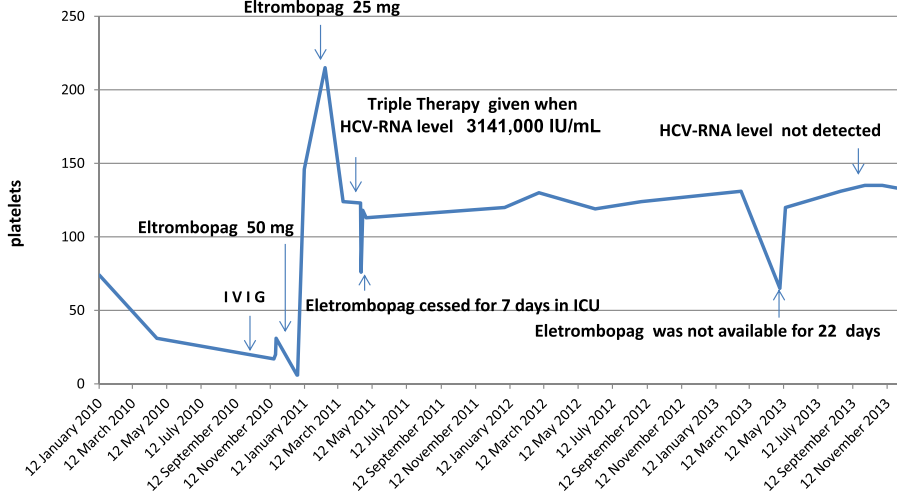

**Intravenous immunoglobulin ( IV IG ) , intensive care unit ( ICU ) , Hepatitis C virus ( HCV ) , Ribonucleic acid ( RNA )**
